# Supplementary material for: FSIP2 can serve as a predictive biomarker for Clear Cell Renal Cell Carcinoma prognosis
Source: PubMed Central journal article supplement (PMC7645329; doi:10.7150/ijms.48971), 2020-10-08

# Supplementary figure 1

Association of FSIP2 with other regulatory genes explored by STRING database.

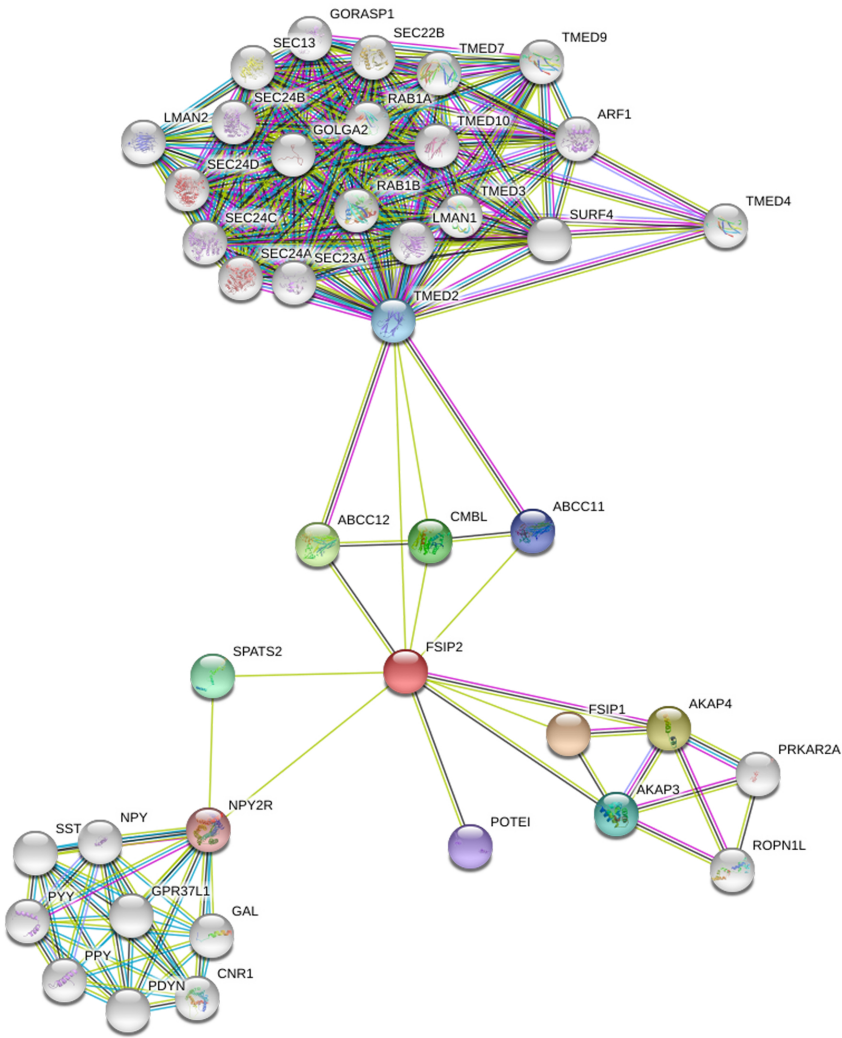

Supplement: ijmsv17p2819s1.pdf [file ijmsv17p2819s1.pdf]
